# Supplementary material
Source: Elsevier journal article supplement (https://www.sciencedirect.com/science/article/pii/S1575181318303255)
Supplement: mmc1 [file S1575181318303255:mmc1.pdf]

## MATERIAL ADICIONAL

### ANEXO 1. ESQUEMA DEL ANÁLISIS DAFO y ACCIONES. 2012.

Extracto de la Ponencia “Cómo servir de motivación y guía al joven investigador”

AREDA 2014.

## Análisis de la situación

| <b>Debilidades</b>                                                                                                                                                                                                                                                                                                                                                      | <b>Amenazas</b>                                                                                                                                                                                                                                                                                                          |
|-------------------------------------------------------------------------------------------------------------------------------------------------------------------------------------------------------------------------------------------------------------------------------------------------------------------------------------------------------------------------|--------------------------------------------------------------------------------------------------------------------------------------------------------------------------------------------------------------------------------------------------------------------------------------------------------------------------|
| <ul style="list-style-type: none"> <li>➤ Escasez de recursos.</li> <li>➤ Personal experimentado no tiene tiempo</li> <li>➤ Dificultades para aplicar el conocimiento adquirido en formaciones previas.</li> <li>➤ Inexperiencia en la gestión de proyectos.</li> <li>➤ Inexperiencia en la gestión de riesgos.</li> <li>➤ Desconocimiento de la legislación.</li> </ul> | <ul style="list-style-type: none"> <li>➤ Disociación de la investigación del resto de la actividad profesional.</li> <li>➤ No es una prioridad, “no tengo tiempo”.</li> <li>➤ Los residentes no se sienten respaldados cuando desean emprender sus propias ideas de investigación.</li> </ul>                            |
| <b>Fortalezas</b>                                                                                                                                                                                                                                                                                                                                                       | <b>Oportunidades</b>                                                                                                                                                                                                                                                                                                     |
| <ul style="list-style-type: none"> <li>➤ Buena relación con Colegio de médicos y farmacéuticos interesados en impartir formación.</li> <li>➤ Impartición de cursos breves en el hospital para todos los residentes de estadística, Lectura crítica y elaboración de protocolo.</li> </ul>                                                                               | <ul style="list-style-type: none"> <li>➤ Investigación dentro de objetivos de programas de formación especializada.</li> <li>➤ En la mayoría de centros hay Unidades de investigación y grupos de investigación.</li> <li>➤ Hay adjuntos que necesitan de más colaboradores para llevar a cabo sus proyectos.</li> </ul> |

## CAME

- *Búsqueda de patrocinador para impartir clases orientadas a adquisición habilidades de gestor de proyectos y reforzar aspectos metodológicos y éticos-legales y los relacionados con la formación de equipos de trabajo.*
- *Búsqueda de profesores motivados cuyo trabajo esté relacionado con la investigación (Servicios de Farmacología clínica, CEIC, Unidad Investigación, ...)*
- *Iniciar negociación del patrocinio por los Colegios.*
- *Presentación en los Cursos de acogida para despertar interés, presentar secciones del programa de especialidades referentes a investigación y presentar oferta.*
- *Fomentar la constitución de equipos multidisciplinares.*

## **ANEXO 2. PROGRAMA FORMATIVO 2017.**

Temario:

- Etapas de la investigación científica.
- Formulación de preguntas y Búsqueda bibliográfica.
- La idea de investigación. Definición del problema.
- Formulación de la hipótesis.
- Principios éticos.
- Estudios de cohortes.
- Estudios de casos controles.
- Estudios transversales.
- Trabajar en la pregunta de investigación para su proyecto final de curso.
- Estudios experimentales.
- Investigación cualitativa
- Análisis multivariado avanzado.
- Modelos de regresión logística.
- Regresión de Cox con riesgos proporcionales.
- Técnicas de muestreo.
- Aspectos legales
- Elaboración del Protocolo y otros documentos
- Consentimiento informado
- Trámites administrativos y evaluaciones previas a la puesta en marcha.
- Responsabilidades y obligaciones de los investigadores.
- Creación y mantenimiento de un archivo del investigador.
- Formación de equipos.

- Plan de trabajo.
- Difusión de resultados: Congresos, Publicaciones (cómo, dónde, quiénes son autores, agradecimientos)
- Solicitud de financiación. Convocatorias.

Taller de evaluación de un protocolo y de una hoja de información a pacientes.

Tutorías para asesoramiento al alumno en la elección del diseño y elaboración del protocolo.

## **ANEXO 3. LISTADO DE PROYECTOS Y PREMIOS**

### **PROYECTOS 2013**

1. Evaluación del grado de satisfacción de los pacientes ambulatorios atendidos en el Servicio de Medicina Nuclear Hospitalario.
2. Estudio descriptivo comparativo entre la diverticulitis apendicular y la apendicitis aguda para evaluar posibles diferencias clínicas, analíticas, radiológicas, anatomopatológicas, etc. entre ambas entidades, que, en la práctica son generalmente casi indistinguibles.
3. Ensayo quirúrgico aleatorizado, controlado y abierto con modelo animal (conejo), para estimar la eficacia de la distracción ósea y el transporte óseo, combinados con la radioterapia en la calidad de la formación ósea.
4. Perfil metabólico e incidencia de eventos cardiovasculares en pacientes con psoriasis moderada-severa tratados con fármacos sistémicos.
5. Evaluación prospectiva del registro de pacientes con dolor neuropático secundario a patología raquimedular refractario a tratamiento farmacológico habitual.
6. Registro pacientes gastrectomía tubular laparoscópica.
7. Estudio randomizado prospectivo para valorar eficacia y seguridad comparada entre el sistema rígido (Wallis) y el sistema elástico (Biologig) en pacientes con estenosis canal lumbar.
8. Estudio de cohortes observacional descriptivo para analizar la relación entre el intervalo de tiempo de suspensión de bifosfonatos endovenosos antes de un tratamiento dental con la aparición de osteonecrosis maxilar.
9. Supervivencia de los Biológicos y motivos de retirada de los mismos en el tratamiento de la psoriasis moderada-severa
10. Uso de Biomarcadores para la detección precoz de cardiotoxicidad por quimioterápicos.
11. Ensayo clínico, aleatorizado, doble ciego y controlado con placebo, para evaluar el efecto sobre la morbi-mortalidad de la lactoferrina bovina y el lactobacillus rhamnosus en prematuros <2000 gr y < 34 semanas de gestación.
12. Estudio cualitativo sobre la percepción y experiencias de las mujeres intervenidas de cesárea bajo anestesia regional en Tenerife.

13. Efectos del Propofol sobre la presión portosistémica y el flujo de colaterales en un modelo de ratas con hipertensión portal.
14. Estudio observacional de cohorte histórico sobre el manejo de la obstrucción colónica maligna: endoprótesis metálica autoexpandible como tratamiento inicial frente a la cirugía de emergencia como primera opción terapéutica.
15. Ensayo clínico randomizado para evaluar la efectividad y eficiencia de los distintos tipos de rehabilitación peneana precoz en pacientes prostatectomizados.
16. Estudio observacional de cohorte histórico sobre el manejo de la obstrucción colónica maligna: endoprótesis metálica autoexpandible como tratamiento inicial frente a la cirugía de emergencia como primera opción terapéutica.
17. Ensayo clínico randomizado para evaluar la efectividad y eficiencia de los distintos tipos de rehabilitación peneana precoz en pacientes prostatectomizados.
18. Accidente percutáneo por pinchazo, corte o salpicadura con riesgo biológico en trabajadores del Complejo Hospitalario Universitario de Canarias (CHUC), desde 2011 hasta 2012.
19. Estudio descriptivo de cohorte histórica de caracterización, evolución y seguimiento de pacientes con cáncer de mama invasivo de la Consulta de la Unidad de patología mamaria del Hospital Universitario de Canarias entre 2002 y 2012, con el hallazgo de células tumorales aisladas y micrometástasis en el resultado definitivo de anatomía patológica del ganglio centinela.
20. Ensayo clínico randomizado abierto, de dos grupos paralelos, estratificado por severidad para estimar el coste-efectividad de la descompresión quirúrgica vs a la infiltración local con corticoides en el Síndrome de Túnel Carpiano (STC)-CARPA2013
21. Procalcitonina como indicador de sepsis abdominal en pacientes intervenidos de neoplasia de colon.
22. Estudio de los niveles de metales pesados en tejidos mamarios con cáncer, con patología benigna y adiposo sano.
23. Estudio de la efectividad y los costes sanitarios de la prostatectomía radical y la braquiterapia prostática en el tratamiento del cáncer de próstata localizado: estudio de cohortes.

24. Comparación de la medición con un patrón oro y la estimación mediante fórmulas de la función renal en pacientes con insuficiencia cardíaca.
25. Estudio de la satisfacción de los pacientes sometidos a distintas técnicas anestésicas que reciben previamente a la cirugía la visita de su anestesista.

### **PREMIOS 2013**

Primer premio: “Ensayo clínico randomizado abierto, de dos grupos paralelos, estratificado por severidad para estimar el coste-efectividad de la descompresión quirúrgica vs a la infiltración local con corticoides en el Síndrome de Túnel Carpiano (STC)-CARPA2013”. Residente de Servicio de Traumatología.

Segundo premio: “Estudio de los niveles de metales pesados en tejidos mamarios con cáncer, con patología benigna y adiposo sano”. Residente de Servicio Ginecología y Obstetricia.

Tercer premio: “Efectos del Propofol sobre la presión portosistémica y el flujo de colaterales en un modelo de ratas con hipertensión portal”. Residente de Servicio Digestivo.

### **PROYECTOS 2014**

1. Causas de retraso o rechazo de la vacunación en niños en el área norte de Tenerife.
2. Estudio del estrés oxidativo placentario en las gestantes obesas y con Apnea Obstructiva del Sueño.
3. Papel de la gammagrafía de glándulas salivales en el diagnóstico del síndrome de Sjögren: análisis de una cohorte histórica.
4. Factores de riesgo asociados a la colonización por *Klebsiella pneumoniae* productora de carbapenemasa en el Hospital Universitario de Canarias.
5. Correlación de la medida del anillo valvular aórtico entre la ecocardiografía transesofágica 2D vs Angio-TCMD de cara a la elección del tamaño protésico en los implantes percutáneos en pacientes con estenosis aórtica severa. Estudio piloto.

6. Estudio de morbilidad materna a corto, mediano y largo plazo de las lesiones obstétricas del esfínter anal, en una cohorte entre los años 2008 y 2011 en el HUC.
7. Descripción de los patrones de síndrome de Sjögren primario en una cohorte histórica.
8. Evaluación del rendimiento diagnóstico de la determinación de la tasa de filtración glomerular por aclaramiento de iohexol en ratas con cirrosis hepática y fracaso renal.
9. Monitorización de Video-EEG de las convulsiones neonatales. Estudio descriptivo de los hallazgos clínicos-EEG.
10. Bondad diagnóstica de la ecografía en la apendicitis aguda.
11. Tratamiento y evolución del Cáncer de vejiga no musculoinvasivo de alto grado, cistectomía vs tratamiento conservador: Cohortes histórico.
12. Respuesta clínica y radiológica del carcinoma hepatocelular (CHC) a terapia locorregional con DEB-TACE e influencia de polimorfismos genéticos implicados en angiogénesis.
13. Estudio de cohortes retrospectivo observacional para determinar el impacto en la supervivencia de un segundo injerto renal y en la morbimortalidad del paciente que lo recibe de una transplacentomía vs embolización previa del injerto fallido.
14. Incidencia de las bacteriemias nosocomiales secundarias hospitalarias: procedencia, etiología y factores de riesgo asociados.
15. Estudio de cohortes observacional y prospectivo para conocer la tasa anual de lesiones perineales que afectan el esfínter anal, en partos vaginales (eutócicos e instrumentales) en el Hospital Universitario de Canarias, así como valorar los posibles factores de riesgo para la producción de dichas lesiones. Identificación y observación de la posible patología del suelo pelviano materno posterior.
16. Análisis de las neuropatías periféricas asociadas a la administración subcutánea del bortezomib en comparación con la administración endovenosa.
17. Impacto de la descontaminación digestiva selectiva sobre el consumo de antibióticos y etiología de las neumonías asociadas a ventilación mecánica
18. Efectividad de las 4 opciones terapéuticas establecidas en el tratamiento de las fracturas de cabeza radial tipo I mason: estudio de cohorte.

19. Estudio de cohortes retrospectivas sobre relación entre translucencia nuchal y malformaciones durante la gestación o al nacimiento
20. Factores de riesgo en fractura de cadera en pacientes mayores de 60 años. Estudio transversal en Canarias.
21. Dermatitis acneiforme secundaria a inhibidores de tirosin-kinasa: posible marcador de respuesta. Estudio observacional sobre una cohorte histórica del Hospital Universitario de Canarias.
22. Prevalencia y comportamiento de la preeclampsia. Hospital Universitario de Canarias 2013.
23. Evaluación prospectiva de los marcadores pronósticos ecográficos de la receptividad endometrial en ciclos de transferencia de embriones congelados.

#### **PREMIOS 2014:**

El **primer premio** "Respuesta clínica y radiológica del Carcinoma HepatoCelular (CHC) a terapia locoregional con DEB-TACE e influencia de polimorfismos genéticos implicados en angiogénesis". Residente de Servicio Aparato Digestivo.

El **segundo premio** "Factores de riesgo en fractura de cadera en pacientes mayores de 60 años. Estudio transversal en Canarias". Residente de Servicio de Reumatología

Y el **tercero** "Estudio del estrés oxidativo placentario en las gestantes obesas y con Apnea Obstructiva del Sueño". Residente de Servicio de Ginecología y Obstetricia.

#### **PROYECTOS 2016**

1. Correlación entre hallazgos por ecografía transvaginal e histopatología en biopsia endometrial.
2. Análisis de persistencia, efectividad y eficiencia de los fármacos biológicos en pacientes diagnosticados de psoriasis moderada-severa en un hospital de tercer nivel.
3. Impacto psicosocial de la hidrosadenitis psicosocial y sus variables epidemiológicas.
4. Valoración de la adhesión y el cumplimiento del tratamiento inhalado en la enfermedad pulmonar obstructiva crónica (EPOC).
5. Estudio epidemiológico sobre los pacientes diabéticos tipo 1 de la zona norte de Tenerife.



6. Afectación psicosocial en la rosácea.
7. Efecto del precondicionamiento con Levosimendán sobre el síndrome de bajo gasto cardíaco postoperatorio en pacientes con disfunción sistólica severa sometidos a cirugía cardíaca electiva: estudio de cohorte.
8. Factores de Riesgo en pacientes jóvenes con Ictus en el Hospital Universitario de Canarias.

## **PREMIOS 2016**

**Primer premio:** "Valoración de la adhesión y el cumplimiento del tratamiento inhalado en la enfermedad pulmonar obstructiva crónica (EPOC): Estudio de cohortes prospectivo." Residente de Neumología

**Segundo premio:** "Análisis de la persistencia, efectividad y eficiencia de los fármacos biológicos en pacientes diagnosticados de psoriasis moderada-severa en un hospital de tercer nivel" Residente de Dermatología.

**Tercer premio:** "Factores de riesgo en pacientes jóvenes con ictus en el Hospital Universitario de Canarias". Residente de Neurología.

## **PROYECTOS 2017**

1. Estudio prospectivo y aleatorizado que compara la resección con asa fría y la mucosectomía en pólipos de 4 a 9 mm. CÓDIGO: 2017\_38 (Asavsmuco1)
2. Efectos del tratamiento con Levotiroxina sobre los eventos perinatales en pacientes gestantes con hipotiroidismo subclínico. (TIRGEST). CÓDIGO: 2017\_28
3. NGAL como predictor de daño renal en pacientes post-administración de contrastes intravenosos. CÓDIGO: 2017\_31 (LGP1701)
4. Riesgo de desprendimiento prematuro de placenta asociado al uso de Ácido Acetil Salicílico en la gestación. CÓDIGO: 2017\_32 (AGM17)
5. Incidencia de depresión en gestantes hospitalizadas. CÓDIGO: 2017\_30 (MMM1234)
6. Relación entre la expresión del marcador Ki67 y la carga tumoral residual tras neoadyuvancia en pacientes con cáncer de mama. CÓDIGO: 2017\_52
7. Cuantificación de la función renal diferencial con SPECT-DMSA en pacientes intervenidos de tumoración renal. CÓDIGO: 2017\_33

8. Descripción de Reacciones Adversas notificadas en relación con la vacuna contra *Neisseria meningitidis* serogrupo B (BEXSERO). CÓDIGO: 2017\_45
9. Impacto de la dieta baja en fibra en la calidad de limpieza colónica previa a la colonoscopia. Estudio aleatorizado comparando 1 día frente a 3 días de dieta baja en fibra. CÓDIGO: 2017\_29 (DIETPREP)

## **PREMIOS 2017**

PRIMER PREMIO: Estudio prospectivo y aleatorizado que compara la resección con asa fría y la mucosectomía en pólipos de 4 a 9 mm. CÓDIGO: 2017\_38 (Asavsmuco1). Residente de Servicio de Digestivo.

SEGUNDO PREMIO: Efectos del tratamiento con Levotiroxina sobre los eventos perinatales en pacientes gestantes con hipotiroidismo subclínico. (TIRGEST). CÓDIGO: 2017\_28. Residentes de Endocrinología.

TERCER PREMIO: NGAL como predictor de daño renal en pacientes post-administración de contrastes intravenosos. CÓDIGO: 2017\_31 (LGP1701). Residente de Análisis clínicos.
